# Supplementary material
Source: Research Square preprint supplement (doi:10.21203/rs.3.rs-9733175/v2)
Supplement: Supplementary file 1 [file 02b3535b8d8401c53376d329.docx]

**10. Annex I**

**10.1 ENGLISH STRUCTURED QUESTIONNAIRE**

Bahir dar University College of Medicine and Health Science Department of Psychiatry.

Dear, participants: these questionnaires are prepared by psychiatry post-graduation student to assess the level and associated factor of postpartum depression literacy among women’s who had ANC follow up in order to collect necessary information to know its outcomes and developing appropriate strategies to minimize its negative consequences. To attain this purpose your honesty and genuine participation is very important and highly appreciable. Please be assured that all information gathered will be kept strictly confidential. If you are voluntary to participate in the study we kindly request you to provide your response for the questionnaire in the next page.

Are you voluntary? A. yes B. no

Part- One: - Socio-Demographic Questionnaires

| No | Questions |  |
| --- | --- | --- |
| 1 | Age in year |  |
| 2 | What is your religion? | 1. Orthodox 2. Protestant 3. Muslim 4.other |
| 3 | What is your ethnicity? | 1. Amhara 2.tigray 3.oromo 4. Other |
| 4 | What is your marital status? | 1 Married 2. Single 3 Divorced 4 Widowed |
| 5 | Residence | 1. Urban 2.Rural |
| 6 | Educational status | 1. unable to read and write 2. Primary school 3.High school 4.Collage/University |
| 7 | Monthly income |  |

Obstetric and clinical characteristics of pregnant women’s attending

| No | Questions |  |
| --- | --- | --- |
| 1 | How many times you become pregnant including this pregnancy? (Gravidity) | 1.0ne 2.Two or more |
| 2 | Previous number of children | 1.0 2.1 3.>2 |
| 3 | Previous history of poor birth outcome | 1. Yes 2. No |
| 4 | If your answer is yes which one of the followings? (multiple response possible) | 1. Preterm birth 2. Low birth weight  3. Abortion 4. Still birth  5. other |
| 5 | Is the current pregnancy planned? | 1. Yes 2. No |
| 6 | Previous ANC follow up | 1. Yes 2. No |
| 7 | Have you told as you had any medical problems in the last 12 months related to this pregnancy? | 1. Yes 2. No |
| 8 | If your answer is yes for Q7, Which medical problems? (Multiple response possible)? | 1.dm 2.Renal problem  3. Cardiac problem 4. Liver problem 5.Others |

**POSTPARTUM DEPRESSION LITERACY QUESTIONNI**

|  |  | Strongly disagreed | Disagree | Not sure | agree | Strongly agree |
| --- | --- | --- | --- | --- | --- | --- |
| Q1 | Feeling unusually sad and teary may be a symptom of postpartum depression | 1 | 2 | 3 | 4 | 5 |
| Q2 | Sleeping too much or too little may be a sign of postpartum depression | 1 | 2 | 3 | 4 | 5 |
| Q3 | Eating too much or losing appetite may be a sign of postpartum depression | 1 | 2 | 3 | 4 | 5 |
| Q4 | Losing interest and joy in activities may be a symptom of postpartum depression | 1 | 2 | 3 | 4 | 5 |
| Q5 | Postpartum depression affects person’s memory and concentration | 1 | 2 | 3 | 4 | 5 |
| Q6 | Symptoms and signs of postpartum depression last for at least two weeks | 1 | 2 | 3 | 4 | 5 |
| Q7 | How likely is postpartum depression caused by problems related to gene or heredity? | 1 | 2 | 3 | 4 | 5 |
| Q8 | How likely is postpartum depression caused by stressful circumstances in life (e.g. death of a family member or divorce)? | 1 | 2 | 3 | 4 | 5 |
| Q9 | How likely is postpartum depression caused by the lack of social support (e.g. support from intimate partner)? | 1 | 2 | 3 | 4 | 5 |
| Q10 | How likely is postpartum depression caused by a previous history of depression? | 1 | 2 | 3 | 4 | 5 |
| Q11 | How likely is postpartum depression caused by a hormonal imbalance? | 1 | 2 | 3 | 4 | 5 |
| Q12 | Physical activity is effective in the prevention or management of postpartum depression | 1 | 2 | 3 | 4 | 5 |
| Q13 | Seeking help with tasks like baby care and housework from intimate partners and family members is helpful for the prevention or management of postpartum depression | 1 | 2 | 3 | 4 | 5 |
| Q14 | Religious practices, prayer and going to church are helpful for prevention or management of postpartum depression | 1 | 2 | 3 | 4 | 5 |
| Q15 | Balanced diet is helpful for the prevention or management of postpartum depression | 1 | 2 | 3 | 4 | 5 |
| Q16 | Good sleep is helpful for the prevention or management of postpartum depression | 1 | 2 | 3 | 4 | 5 |
| Q17 | Mental health professionals can treat postpartum depression effectively | 1 | 2 | 3 | 4 | 5 |
| Q18 | Psychotherapy (e.g. talk therapy or consultation) can effectively treat postpartum depression | 1 | 2 | 3 | 4 | 5 |
| Q19 | Antidepressants can be addictive | 5 | 4 | 3 | 2 | 1 |
| Q20 | Antidepressants can cause brain damage | 5 | 4 | 3 | 2 | 1 |
| Q21 | I would rather endure postpartum depression than suffer from mental treatment | 5 | 4 | 3 | 2 | 1 |
| Q22 | Although there are clinics for women with postpartum depression, I distrust them | 5 | 4 | 3 | 2 | 1 |
| Q23 | Most women with postpartum depression are violent | 5 | 4 | 3 | 2 | 1 |
| Q24 | It is best to avoid women with postpartum depression so that the problem will not happen to you | 5 | 4 | 3 | 2 | 1 |
| Q25 | If I have postpartum depression, I won’t tell anyone | 5 | 4 | 3 | 2 | 1 |
| Q26 | I’m worried about what my family and/or friends think about me because of my appointment in the psychology and/or psychiatric department | 5 | 4 | 3 | 2 | 1 |
| Q27 | I know where to find the information about postpartum depression | 1 | 2 | 3 | 4 | 5 |
| Q28 | I know how to use various resources to search for information | 1 | 2 | 3 | 4 | 5 |
| Q29 | I can appraise the accuracy of information about postpartum depression on the radio and television | 1 | 2 | 3 | 4 | 5 |
| Q30 | I can appraise the accuracy of information about postpartum depression on the Internet | 1 | 2 | 3 | 4 | 5 |
| Q31 | I can appraise the accuracy of the suggestions about postpartum depression given by friends and families | 1 | 2 | 3 | 4 | 5 |
|  | % of the variance |  |  |  |  |  |
|  | Cumulative variance |  |  |  |  |  |

A=Attribute.

A1=Ability to recognize postpartum depression.

A2=Attitudes which facilitate recognition of postpartum depression and appropriate help seeking.

A3: Knowledge and beliefs of self-care activities.

A4: Knowledge of how to seek information related to postpartum depression.

A5: Beliefs about professional help available.

A6: Knowledge about professional help available.

A7: Knowledge of risk factors and causes

Part II. Edinburgh Postnatal Depression Scale (EPDS)

Cox J.L., Holden J. M. and Sago sky R. British Journal of Psychiatry (1987), 150, 782-786.

As you are pregnant, we would like to know how you are feeling. Please check the answer that comes closest to how you have felt IN THE PAST 7 DAYS, not just how you feel today.

| Q. No. | Questions | Response options | Skip | Code |
| --- | --- | --- | --- | --- |
| Q .201 | I have been able to laugh and see the funny side of things: | 0-As much as I always could  1-Not quite so much now  2-Definitely not so much now  3-Not at all |  | 1  2  3  4 |
| Q .202 | I have looked forward with enjoyment to things | 0- As much as I ever did  1-Rather less than I used to  2-Definitely less than I used to  3-Hardly at all |  | 1  2  3  4 |
| Q 203 | I have blamed myself unnecessarily when things went wrong | 3-Yes, most of the time  2- Yes, some of the time  1- Not very often  0- No, never |  | 1  2  3  4 |
| Q .204 | I have been anxious or worried for no good reason: | 0- No, not at all  1- Hardly ever  2-Yes, sometimes  3- Yes, very often |  | 1  2  3  4 |
| Q. 205 | I have felt scared or panicky for no good reason | 3- Yes, quite a lot  2- Yes, sometimes  1- No, not much  0- No, not at all |  | 1  2  3  4 |
| Q. 206 | Things have been getting on top of me: | 3-Yes, most of the time I haven’t been able to cope at all  2-Yes, sometimes I haven’t been coping as well as usual  1-No, most of the time I have coped quite well  0-No, I have been coping as well as ever |  | 1  2  3  4 |
| Q .207 | I have been so unhappy that I have had difficulty sleeping | 3-Yes, most of the time  2-Yes, sometimes  1-Not very often  0-No, not at all |  | 1  2  3  4 |
| Q .208 | I have felt sad or miserable | 3-Yes, most of the time  2-Yes, quite often  1-Not very often  0-No, not at all |  | 1  2  3  4 |
| Q. 209 | I have been so unhappy that I have been crying | 3-Yes, most of the time  2-Yes, quite often  1-Only occasionally  0-No, never |  | 1  2  3  4 |
| Q. 210 | The thought of harming myself has occurred to me | 3-Yes, quite often  2-Sometimes  1-Hardly ever  0-Never |  | 1  2  3  4 |

PHQ 9 QUESTIONERIS

| Over the last 2 weeks, on how many days have you been bothered by any of the following problems? | Not at all | Several Days | Several Days | Nearly every day |
| --- | --- | --- | --- | --- |
| 1 Little interest or pleasure in doing things | 0 | 1 | 2 | 3 |
| 2 Feeling down, depressed or hopeless | 0 | 1 | 2 | 3 |
| 3 Trouble falling or staying asleep, or sleeping too much | 0 | 1 | 2 | 3 |
| 4 Feeling tired or having little energy | 0 | 1 | 2 | 3 |
| 5 Poor appetite or over eating | 0 | 1 | 2 | 3 |
| 6 Feeling bad about yourself –or that you are a failure or have let yourself or your family down | 0 | 1 | 2 | 3 |
| 7 Trouble concentrating on things, such as reading the newspaper or watching television | 0 | 1 | 2 | 3 |
| 8 Moving or speaking so slowly that other people could have noticed, or the opposite –being so fidgety or restless that you have been moving around a lot more than usual | 0 | 1 | 2 | 3 |
| 9 Thoughts that you would be better off dead or of hurting yourself in some way | 0 | 1 | 2 | 3 |
| Total score |  |  |  |  |

**SOCIAL SUPPORT QUESTIONNAIRE**

| **OSLO-3 social support scale(OSS-3)** | | |
| --- | --- | --- |
| 1 | **How money people are to close to you that you can count on them if you have serious problems** | |
| None | 1 |
| 1 or 2 | 2 |
| 3 to 5 | 3 |
| 6 or more | 4 |
| 2 | **How much concern do people show in what you are doing?** | |
| A lot of concern and interest | 5 |
| Some concern and interest | 4 |
| Uncertain | 3 |
| Little concern and interest | 2 |
| No concern and interest | 1 |
| 3 | **How easy can you get practical help from neighbors if you should need it?** | |
| Very easy | 5 |
| Easy | 4 |
| Possible | 3 |
| Difficult | 2 |
| Very difficult | 1 |

**The three constructs of Violence against pregnant women**

Physical violence against pregnant women

| No | Questions | |  |
| --- | --- | --- | --- |
| 401.1 | Has he Push or shoved you, or shake your hands? | | 1. Yes 2. No |
| 401.2 | Has he slapped you or thrown something at you that could hurt you? | | 1. Yes 2. No |
| 401.3 | Has he Punch or hit you with his fist, or twist your arm or with something that could hurt you? | | 1. Yes 2. No |
| 401.4 | Has he Kick you, drag or beaten you? | | 1. Yes 2. No |
| 401.5 | Have you scalded or burnt purposefully by your husband? | | 1. Yes 2. No |
| 401.6 | Did the following ever happen because of something your husband did to you? | | 2. You had any injury/ broken bone  3. Trauma to your abdomen/genitalia  4. Other |
| 401.7 | Was there any of your property deliberately damaged when your husband used force against you even if the incident was not very serious? | | 1. Yes 2. No  3. Can’t remember |
| 401.8 | How often any of the above offenses happen to you in the last nine months? | 1. Every day  2. At least once per week  3. At least once per month  4. Once during pregnancy period  5. Not at all | |
| 401.9 | Do any of the above listed violations are/were committed by other persons (friends, relatives, strangers…etc) upon you within the last 9 months? | 1. Yes 2. No | |
| 401.10 | If yes Q401.10, who made this offenses? | 1. Mother in law 2. Father in law 3. Stranger 4. Others | |

Psychological violence against pregnant women

| No | Questions |  |
| --- | --- | --- |
| 402.1 | Have you ever been insulted by your husband using abusive language that made you feel bad about yourself? | 1. Yes 2. No |
| 402.2 | Have you ever been threatened by your husband with an object such as a stick, belt, knife, gun, or other type of weapon etc.? | 1Yes 2. No |
| 402.3 | Have you ever been ignored or shown indifference by your husband? | 1. Yes 2. No |
| 402.4 | Has he belittled or humiliated you in front of other people? | Yes 2. No |
| 402.5 | .Have you ever been denied by your husband on your basic personal needs? | 1, Yes 2, No |
| 402.6 | .Have you ever been intentionally not involved by your husband on decision making in the family? | 1, Yes 2. No |
| 402.7 | Has he done things to scare or intimidate you on purpose? | 1, Yes 2. No |
| 402.8 | Does your husband has been tried to harm or injured anything or anyone you love? | 1. Yes 2. No |
| 402.9 | How often any of the above offenses happen to you in the last nine months? | 1. Every day  2. At least once per week  3. At least once per month  4. Once during pregnancy period  5. Not at all |
| 402.10 | Do any of the above listed violations are/were committed by other persons (friends, relatives, strangers…etc.) upon you within the last 12 months? | 1. Yes 2. No |
| 402.11 | If yes Q401.10, who made this offenses? | 1. Mother in law  2. Father in law  3. Stranger  4. Others |

Sexual violence against pregnant women related questions

| No | Questions |  |
| --- | --- | --- |
| 403.1 | When you know your husband has a disease that can be sexually transmitted, can you refuse to have intercourse with him beyond his desire? | 1, Yes 2, No |
| 403.2 | .Have you ever physically forced by your husband to have sex when you did not want to? | 1, Yes 2, No |
| 403.3 | Have you ever intentionally denied or avoided sex by your husband? | 1, Yes 2, No |
| 403.4 | Did you ever have sexual intercourse when you didn’t want because you were afraid of What he might do? | 1, Yes 2, No |
| 403.5 | Has he forced you to do something sexual that you found degrading or humiliating? | 1, Yes 2, No |
| 403.6 | .How often any of the above offenses happen to you in the last nine months? | 1. Every day  2. At least once per week  3. At least once per month  4. Once during pregnancy period  5. Not at all |
| 403.7 | Do any of the above listed violations happen to you are/were committed by other persons (friends, relatives, strangers…etc.)? | 1, Yes 2, No |
| 403.8 | If yes Q403.7, who made this offenses?  Q501. You can give additional remark and comments regarding to violence against women. | 1. Mother in law  2. Father in law  3. Stranger  4. Others |

10.2 አማርኛ መጠይቆች

ለተሳታፊወችየሚሰጥመረጃእናስምመነትበአማርኛ

እኔወዳጀነሽአዲስበባህርዳርዩኒቨርሲቲህክምናእናጤናሳይንስኮሌጅበስነአእምሮክፍልየሁለተኛድግሪተመራቂተማሪስሆንየመመረቂያጥናቴስለድህረወሊድድባቴበሽታየግንዛቤልክእናተያያዥምክንያቶችይመለከታል።ለጥናቱየሚሆነውመረጃየሚሰበሰበውየቅድመወሊድክትትልየሚያደርጉእናቶችመሆኑጥናቱንእርሰዎየዚህጥናትተሳታፊሆነውበጣተመርጠዋል።ይህጥናትየሚሰጠውቀጥተኛጥቅምሆነጉዳትየለውም።በመሳተፉዎግንከመረጃውየሚገኘውእውቀትለመማሪያ፣ለምርምር፣እናለህክምናግባትበመሆንያገለግላል።መረጃየሚሰጡትበፈቃደኝነትላይተመስርቶሲሆንበማንኛውምሰዐትየማቋርጥያልተገደበመብትዎየተጠበቀነው፡፡የሚሰጡትመረጃበሚስጥርየሚቀመጥሲሆንስምዎትንመጥቀስዐስፈላጊባለመሆኑዐለመናገርይችላሉ።ይህቃለመጠይቅእስከ 20 ደቂቃሊወስድይችላልከላይበተገለፁትጉዳዮችተስማምተውከሆነመረጃለመስጠትመስማማትዎንበፊርማዎትእንዲያረጋግጡልኝበትህትናእጠይቀዎታለሁ፡፡

ፊርማ …………..

ክፍል- አንድ፡ - የማህበራዊ ሁኔታ መጠይቆች

| ተ/ቁ | ጥያቄዎች | | መልስ |
| --- | --- | --- | --- |
| 1 | ዕድሜ በቁጥር | | ……… |
| 2 | ሃይማኖትዎምንድንነው? | | 1. ኦርቶዶክስ 2. ፕሮቴስታንት 3 ሙስሊም  4. ሌላካለይግለጹ |
| 3 | ብሄርዎምንድንነው? | | 1.አማራ 2.ትግራይ 3.ኦሮሞ4. ሌላካለይግለጹ። |
| 4 | የጋብቻሁኔታ? | | 1.ያላገባ 2 ያገባ 3 የተፋታ 4 ባልየሞተባት |
| 5 | የመኖሪያቦታ | | 1. ከተማ 2. ገጠር |
| 6 | የትምህርትደረጃ | | 1.ማንበብእናመፃፍየማትችል 2. የመጀመሪያደረጃ  3. ሁለተኛደረጃ4. ኮሌጅ / ዩኒቨርሲቲ |
| 7 | | ወርሃዊገቢበብርስንትነው |  |

**እርግዝናንናወሊድንእንዲሁምአጠቃላይየጤናሁኔታንየተመለከቱጥያቄዎች**

| ተ/ቁ | ጥያቄዎች | መልስ |
| --- | --- | --- |
| 1 | በእድሜዎስንትጊዜነፍሰጡርሆነውያውቃሉ? (የአሁኑንጨምሮ | 1.አንድጊዜ 2.ሁለትእናከዚያበላይ |
| 2 | ከዚህበፊትስንትልጅአለዎት ? | 1.ምንም2. አንድ  3.ሁለትእናከዚያበላይ |
| 3 | ከዚህበፊትበነበሩትእርግዝናዎችየገጠመዎትጥሩያለሆነየእርግዝናውጤትነበር? | 1. አዎ 2.የለም |
| 4 | .ለጥያቄ3 መልሱአዎከሆነ; የትኞቹገጠመዎት? (ከአንድበላይመመለስይቻላል) | 1. 9 ወርሳይሞላውመወለድ 2. የህፃኑክብደትትንሽመሆን 3. ዉርጃ 4. ህፃኑሲወለድመሞት 5. ሌላ(ይገለፅ)------------- |
| 5 | የአሁኑእርግዝናየታቀደነው? | 1. አዎ 2.የለም |
| 6 | ከዚህበፊትየቅድመ_ወሊድክትትልነበርዎት? | 1. አዎ 2.የለም |
| 7 | ባለፉት 9 ወራትውስጥከእርግዝናጋርየተያያዙየጤናእክሎች/ችግሮች/ ገጥሞዎትነበር? | 1. አዎ 2.የለም |
| 8 | .ለጥያቄ 7 መልሱአዎከሆነ; የትኞቹየጤናእክሎች/ችግሮች/ አጋጠመዎት? (ከአንድበላይመመለስይቻላል) | 1. ስኳርበሽታ 2. የኩላሊትበሽታ 3. የልብበሽታ 4. የጉበትበሽታ 5. ሌላ(ይገላፅ)------- |

ክፍልሶስት :-የቅድመወሊድድባቴእውቅናመጠይቅ ( POSTPARTUM DEPRESSION LITERACY QUESTIONNI)

|  | **ለሚከተሉት ጥያቄዎችመልስ ይሆናሉ ብለውለሚያስትአማራጭ ከስሩ ”√”በማስቀመጥ ያሳዩ** | **በጣም**  **አልስማማም** | **አልስማማም** | **እርግጠኛአይደለሁም** | **እስማማለሁ** | **በጣም**  **እስማማለሁ** |
| --- | --- | --- | --- | --- | --- | --- |
| **1** | **ባልተለመደሁኔታማዘንእናማልቀስየድህረወሊድድብርትምልክትሊሆንይችላልብለውምንያህልይስማማሉ?** | **1** | **2** | **3** | **4** | **5** |
| **2** | **ብዙወይምትንሽመተኛትየድህረወሊድድብርትምልክትሊሆንይችላል ብለው ምን ያህል ይስማማሉ?** | **1** | **2** | **3** | **4** | **5** |
| **3** | **የምግብ ፍላጎት መጩመርወይምመቀነስየድህረወሊድድብርትምልክትሊሆንይችላል ብለው ምን ያህል ይስማማሉ?** | **1** | **2** | **3** | **4** | **5** |
| **4** | **በአብዛኛዎቹነገሮችላይፍላጎትማጣትወይምደስታማጣትየድህረወሊድድብርትምልክትሊሆንይችላል ብለው ምን ያህል ይስማማሉ?** | **1** | **2** | **3** | **4** | **5** |
| **5** | **የድህረወሊድድብርትየሰውንየማስታወስእናትኩረትንይጎዳል ብለው ምን ያህል ይስማማሉ?** | **1** | **2** | **3** | **4** | **5** |
| **6** | **የድህረወሊድድብርትምልክቶችቢያንስ 2 ሳምንትእናከዛበላይይቆያል ብለው ምን ያህል ይስማማሉ?** | **1** | **2** | **3** | **4** | **5** |
| **7** | **የድህረወሊድድባቴ በሽታበዘርይተላለፍል ብለውምንያህልይስማማሉ?** | **1** | **2** | **3** | **4** | **5** |
| **8** | **የድህረወሊድድብርትበህይወትውስጥበአስጨናቂሁኔታዎችለምሳሌየሚወዱትንሰውበሞትወይምበፍቺበማጣትየመከሰት እድሉ በምንያህል ደረጃይስማማሉ?** | **1** | **2** | **3** | **4** | **5** |
| **9** | **የድህረወሊድድብርትእንደየቅርብአጋርድጋፍባሉማህበራዊድጋፍማጣትምክንያትምንያህልሊከሰትይችላልብለው ምን ያህል ይስማማሉ?** | **1** | **2** | **3** | **4** | **5** |
| **10** | **የድህረወሊድድብርትከዚህበፊትበነበረውድብርትምክንያትሊከሰትይችላልብለውምንያህልይስማማሉ?** | **1** | **2** | **3** | **4** | **5** |
| **11** | **የድኅረወሊድድብርትበሆርሞንመዛባትምክንያትሊከሰትይችላል ብለው ምን ያህል ይስማማሉ??** | **1** | **2** | **3** | **4** | **5** |
| **12** | **የድህረወሊድድብርትለመከላከልወይምለመቆጣጠርየአካልብቃትእንቅስቃሴውጤታማነውብለውምንያህልይስማማሉ?** | **1** | **2** | **3** | **4** | **5** |
| **13** | **እንክብካቤእናየቤትውስጥስራዎችንከቅርብአጋሮችእናየቤተሰብአባላትእርዳታማግኘትየድህረወሊድድብርትንለመከላከልወይምለመቆጣጠርይረዳልብለውምንያህልይስማማሉ?** | **1** | **2** | **3** | **4** | **5** |
| **14** | **የድኅረወሊድድብርትለመከላከልወይምለመቆጣጠርሃይማኖታዊተግባራት፣ጸሎትእናወደቅዱስስፍራመሄድጠቃሚናቸው ብለው ምን ያህል ይስማማሉ?** | **1** | **2** | **3** | **4** | **5** |
| **15** | **የተመጣጠነምግብመመገብየድህረወሊድድብርትለመከላከልወይምለመቆጣጠርይረዳል ብለው ምን ያህል ይስማማሉ?** | **1** | **2** | **3** | **4** | **5** |
| **16** | **ጥሩእንቅልፍየድህረወሊድድብርትንለመከላከልወይምለመቆጣጠርይረዳል ብለው ምን ያህል ይስማማሉ??** | **1** | **2** | **3** | **4** | **5** |
| **17** | **በአእምሮጤናባለሙያየሚሰጠውየድህረወሊድድብርት, ሕክምናውጤታማሊሆንይችላል ብለው ምን ያህል ይስማማሉ?** | **1** | **2** | **3** | **4** | **5** |
| **18** | **የንግግርሕክምና ወይም የምክርአገልግሎትከወሊድበኋላድብርትንለማከምውጤታማነው ብለው ምን ያህል ይስማማሉ?** | **1** | **2** | **3** | **4** | **5** |
| **19** | **የድብርትመድኃኒቶችሱስየሚያስይዙናቸው ብለው ምን ያህል ይስማማሉ?** | **5** | **4** | **3** | **2** | **1** |
| **20** | **የድብርትመድሐኒቶችየአንጎልጉዳትያስከትላሉብለውምንያህልይስማማሉ?** | **5** | **4** | **3** | **2** | **1** |
| **21** | **በአእምሮህክምናከምሰቃይየድህረወሊድጭንቀትንብታገስእመርጣለሁ ብለው ምን ያህል ይስማማሉ?** | **5** | **4** | **3** | **2** | **1** |
| **22** | **ባሉትየድህረወሊድድብርትህክምናየሚሰጡክሊኒኮችበ**ቂ**ህክምናይሰጣልብለውምንያህልይስማማሉ?** | **5** | **4** | **3** | **2** | **1** |
| **23** | **የድህረወሊድድብርትያለባቸውአብዛኛዎቹሴቶችሊበሳጩይችላሉብለውምንያህልይስማማሉ?** | **5** | **4** | **3** | **2** | **1** |
| **24** | **ከወሊድበኋላድብርትእንዳይፈጠርሴቶችንመርዳትጥሩነው ብለው ምን ያህል ይስማማሉ?** | **5** | **4** | **3** | **2** | **1** |
| **25** | **የድህረወሊድድብርትቢኖርብኝለማንምአልናገርምብለውምንያህልይስማማሉ?** | **5** | **4** | **3** | **2** | **1** |
| **26** | **ቤተሰቦቼወይምጓደኞቼበስነልቦናወይምበስነአእምሮቀጠሮዎችላይበመገኘቴስለእኔምንእንደሚያስቡባለማወቄእፈራለሁ ብለው ምን ያህል ይስማማሉ?** | **5** | **4** | **3** | **2** | **1** |
| **27** | **ስለድህረወሊድድብርትመረጃየሚገኝበትን ትክክለኛ ምንጭ አውቃለሁ ብለው ያስባሉ?** | **1** | **2** | **3** | **4** | **5** |
| **28** | **ስለድኅረወሊድድብርትመረጃለማግኘትየተለያዩምንጮችንእንዴትእንደምጠቀምአውቃለሁብለውምንያህልይስማማሉ?** | **1** | **2** | **3** | **4** | **5** |
| **29** | **በሬዲዮእናበቴሌቭዥንላይስለድኅረወሊድየድብርትመረጃንትክክለኛነትመገምገምእችላለሁብለውምንያህልይስማማሉ?** | **1** | **2** | **3** | **4** | **5** |
| **30** | **በበይነመረብላይስለድኅረወሊድድብርትመረጃንትክክለኛነትመገምገምእችላለሁ ብለው ምን ያህል ይስማማሉ?** | **1** | **2** | **3** | **4** | **5** |
| **31** | **በጓደኞችእናበቤተሰብአባላትየተሰጡኝስለድህረወሊድድብርትምክሮችንትክክለኛነትመገምገምእችላለሁ ብለው ምን ያህል ይስማማሉ?** | **1** | **2** | **3** | **4** | **5** |
|  |  |  |  |  |  |  |

**ክፍል አራት፡-የድህረወሊድድባቴመጠይቅ( Edinburgh Postnatal Depression Scale (EPDS))**

| ተ.ቁ | ጥያቄዎች | መልስ ሊሆኑ የሚችሉ አማራጮች | ኮድ |
| --- | --- | --- | --- |
| 201 | vKð¨< dU”ƒ ¨<eØ ¾’Ña‹” ›em˜ G<’@ታ uT¾ƒ KSXp ‹K¨<’u`; | 1. G<MÑ>²? ¾TÅ`Ñ¨<” ÁIM; 2. vG<’< Ñ>²? ¾Éa¨<” ÁIM ›M‹MU 3. u`ÓÖ˜’ƒ ¾Éa¨<” ÁIM ›M‹MU ’u` 4. õèU ›M‹MU ’u` | 1  2  3  4 |
| 202   | vKð¨< dU”ƒ ¨<eØ ’Ña‹” uÅeታ  /u“õqƒ /c=Övul ’u`; | 0- Ÿ²=I uòƒ ”ÅTÅ`Ñ¨<ÁIM  1-uSÖ’< uòƒ ŸTÅ`Ñ¨< uk’c G<’@  2-u`ÓÖ˜’ƒ uòƒ ŸTÅ`Ñ¨< v’c SÖ”  3-uõèU ›MÖvupU ’u` | 1  2  3  4 |
| 203 | vKð¨< dU”ƒ ¨<eØ ›”Ç”É ’Ña‹ XÃdŸ< c=k` ÁK›Óvw ^c­” Ã¨pc< ’u`; | 3-›­” ›w³—¨<” Ñ>²?  2-›­” ›”Ç”É Ñ>²?  1-u×U Ømƒ Ñ>²?  0-›Ã uõèU ›M’u[U | 1  2  3  4 |
| 204 | vKð¨< dU”ƒ ¨<eØ ÁK um U¡”Áƒ c=Ú’l ¨ÃU c=cÑ< ’u`; | 3-›­ ›w³—¨<” Ñ>²?  2-›­ ›”Ç”È  1-እUw³U ›ÁÒØS˜U  0-›Ã ›ÒØV˜ ›Á¨<pU | 1  2  3  4 |
| 205 | vKð¨< dU”ƒ ¨<eØ ÁK um U¡”Áƒ ¾Sõ^ƒ: ¾Sgu`: É”ÓØ  É”ÓØ ¾TKƒ eT@ƒ ÃcT­ƒ ’u`; | 3-›­ w²<¨<” Ñ>²?  2-›­” ›”Ç”É Ñ>²?  1-u×U Ømƒ Ñ>²?  0-›Ã õèU ›M’u[U | 1  2  3  4 |
| 206 | vKð¨< dU”ƒ ¨<eØ ’Ña‹ G<K< Ÿ›pU­ uLÃ ይJ’<w­ ’u`; | 3-›­ w²< Ñ>²? SssU ›M‰MŸ<U  2-›­ ›”É ›”É Ñ>²? SssU ›M‰MŸ<U  1-¾KU w²< Ñ>²? SssU ‹ÁKG<  0-¾KU ”Å¨ƒaÂ SssU ‹ÁKG< | 1  2  3  4 |
| 207 | vKð¨< dU”ƒ ¨<eØ Åeታ u×U ŸT×ƒ ¾}’X ¾”pMõ ‹Ó` ’u[w­; | 3-›­” ›w³—¨<” Ñ>²?  2-›­” ›”Å”É Ñ>²?  1-¾KU u×U Ømƒ Ñ>²?  0-¾KU ðêV ›M’u[U | 1  2  3  4 |
| 208 | vKð¨< dU”ƒ ¨<eØ ¾SŸóƒ ¨ÃU ¾S]` H²” eT@ƒ ÃcT­ ’u`; | 3-›­” u›w³—¨<” Ñ>²?  2-›­” uSÖ’< w²< Ñ>²?  1-¾KU u×U w²< Ñ>²? ›M’u[U  0-¾KU ðêV ›M’u[U | 1  2  3  4 |
| 209 | vKð¨< dU”ƒ ¨<eØ Åeታ u×U ŸT×ƒ¾}’X ›Mpc¨<’u`; | 3-›­” u›w³—¨<” Ñ>²?  2-›­” uSÖ’< w²< Ñ>²?  1-›Mö ›Mö w‰  0-¾KU ðêV ›M’u[U | 1  2  3  4 |
| 210 | vKð¨< dU”ƒ ¨<eØ uQÃ¨ƒ­ LÃ Ñ<Çƒ KTÉ[e ›eu¨< ’u`; | 3-›­” w²< Ñ>²?  2-›”Ç”É Ñ>²?  1-Uw³U ›eu? ›L¨<pU  0-uõèU ›LcwŸ<U | 1  2  3  4 |

ክፍል ›Ueƒ ፒኤች ኪው 9 መጠየቅ

| ተ.ቁ. | ላለፉት ሁለት ሳምንታት እርሦዎ ከዚህ በታች በተጠቀሱት ችግሮች ምን ያህል አስቸጋሪ ሁኔታዎች ተፈጥሮበታል? /መልስዎትን ለማሳየት/”√”ይጠቀሙ | በፍፁም | ለብዙ ቀናት | ከግማሽቀናች በላይ | በየቀኑማለት ይቻላል |
| --- | --- | --- | --- | --- | --- |
| 1 | ነገሮችን ለማከናወን ያለ ፍላጎት ወይም ደስታ ማነስ አለህ/ሽ? | 0 | 1 | 2 | 3 |
| 2 | የተስፋ መቁረጥ ፣ የሀዘን ወይም ተስፋ ቢስነት ስሜት አለህ/ሽ? | 0 | 1 | 2 | 3 |
| 3 | የመዉደቅ ወይም ተኝቶ የመቆየት ወይም ከመጠን በላይ የመተኛት ችግር አለህ/ሽ? | 0 | 1 | 2 | 3 |
| 4 | የመድከም ስሜት ወይም የሀይል ማነስ አለህ/ሽ? | 0 | 1 | 2 | 3 |
| 5 | ደካማ ወይም ከመጠን በላይ መብላት | 0 | 1 | 2 | 3 |
| 6 | ስለ ራስዎ መጥፎ ስሜት የመሰማት ወይም እራስን እዳልተሳካለት ወይም እራስን ወይም ቤተሰብን እንዳሳዘነ አድርጐ መቁጠር አለዎት? | 0 | 1 | 2 | 3 |
| 7 | ሀሳብን የመሰብሰብ ችግር ለምሳሌ ጋዜጣ በማንበብ ወይም ቴሌቪዥን በመመልከት ወቅት አለዎት? | 0 | 1 | 2 | 3 |
| 8 | ሌሎች ሠዎች ሊታዘቡት በሚችል መልኩ በዝግታ መንቀሳቀስ ወይምመናገር በተቃራኒው ባህሪ ከመጠን በላይ እረፍት የለሽ በመሆን ያልተለመደ እንቅስቃሴን በብዛት ማሳየት አለዎት? | 0 | 1 | 2 | 3 |
| 9 | ብሞት ወይም እራሴ ላይ ጉዳት ባስከትል ይሻለኛል የሚሉ አስተሳሰቦች አሉዎት? | 0 | 1 | 2 | 3 |

**ክፍል ስድስት፡ ከዚህ በመቀጠል የሚመጡት ሦስት ጥያቄዎች የእርስዎን ማህበራዊ ግኑኝነት አና የግል ተሞክሮዎን ይመለከታሉ;; እባክዎትን የእርስዎን የግል ተሞክሮ የሚመለከተውን ምርጫ ብቻ በማክበብ ይተባበሩን፡፡**

| **ማህበራዊ ግኑኝነት መጠይቅ** | | |
| --- | --- | --- |
| 1 | ምንያህልሠውአደጋ (ችግር) በሚያጋጥሞት ጊዜ በቅርብ የችግርዎ ተካፋይ ሊሆኑልዎት ይችላሉ? (አንድ ምርጫ ብቻ ያክብቡ) | |
| ምንም | 1 |
| 1 ወይም 2 | 2 |
| ከ3-5 | 3 |
| 6 እናከዚያበላይ | 4 |
| 2 | ምን ያህል ሠው ስለእርስዎ ግድ ይለዋል? (አንድ ምርጫ ብቻ ያክብቡ) | |
| ብዙ | 5 |
| ጥቂት | 4 |
| እርግጠኛ አይደለሁም | 3 |
| በጣም ትንሽ | 2 |
| ምንም | 1 |
| 3 | ከ ጎደኞችዎ ወይንም አበረው የጋራ መኝታቤት ክሚጋሮአቸው ሠዎች ተጨባጭ እርዳታ የማግኘት እድልዎ ምን ያህል ነው? (አንድ ምርጫ ብቻ ያክብቡ) | |
| በጣም ቀላል | 5 |
| ቀላል | 4 |
| መጠነኛ | 3 |
| አስቸጋሪ ከባድ | 2 |
| በጣም ከባድ | 1 |

**ክፍል ሰባት ፡በነብሰጡርእናቶችላይየሚደርሱየጥቃትዓይነቶችንየተመለከቱጥያቄዎች**

በሀገራችን ተጨባጭ ሁኔታ በነብሰ ጡር እናቶች ላይ የሚፈፀሙ የተለያዩ የጥቃት ዓይነቶች ን አሉ። ፈቃድዎ ከሆነ ከባለቤትዎ ጋር ስላለዎ አጠቃላይ ግንኙነት መጠየቅ እፈልጋለሁ፡፡ ይህ ጥናት የሴቶችንና የጨቅላ ህፃናትን ጤና ለማሻሻል ትልቅ ሚና የሚጫወት ሲሆን የሚነግሩኝ ነገር ሁሉ በኔና በእርስዎ መካከል በሚስጥር የሚቀር ይሆናል። ይኸውም ባለቤትዎ ባለፉት 9 ወራት ውስጥ ከዚህ በታች የተገለፁትን የጥቃት ዓይነቶች አድርሰውበዎት ከሆነ እባክዎን ምንም ሳይደብቁ ሁሉንም ይግለፁልኝ ።

**በነብሰ ጡር እናቶች ላይ የሚፈፀሙ አካላዊ ጥቃ ቶች ን የተመለከቱ ጥያቄዎች**

| ተ/ቁ | ጥያቄዎች | መልስ |
| --- | --- | --- |
| 401.1 | በእርግዝናዎጊዜበባለቤትዎበሀይልተገፍትረው፣አላግባብተጨብጠውያውቃል? | 1. አዎ 2. የለም |
| 401.2 | ባለቤትዎበዚህእርግዝናበጥፊመመታትወይምየሆነነገርተወርውሮብዎትያውቃል? | 1. አዎ 2. የለም |
| 401.3 | ባለቤትዎባለፉት 9 ወራትውስጥበቦክስመመታት፣የመጠምዘዝወይምበሌላነገርመቶዎትያውቃል? | 1. አዎ 2. የለም |
| 401.4 | ባለቤትዎቢላዎ፣ጠብመንጃ፣ወይምሌላየጦርመሳሪያአደጋመዞብዎትያውቃል? | 1. አዎ 2. የለም |
| 401.5 | ባለቤትዎሆንብለውየማቃጠልወይምየማነቅአደጋአድርሰውብዎትያውቃሉ? | 1. አዎ 2. የለም |
| 401.6 | ባለቤትዎበርግጫ/በካልቾመቶዎት፡ደብድቦዎትወይምጎትቶዎትያውቃል? | 1. አዎ 2. የለም |
| 401.7 | በባለቤትዎአካላዊጥቃትምክንያተከሚከተሉትውስጥየደረሰብዎትጉዳትአለ? (ከአንድበላይመልስይቻላል | 1. የሰውነትመቁሰልናማበጥ  2. የአጥንትመሰበርአደጋ  3. የመራቢያአካልጉዳት  4. የሆድእቃጉዳት  5. ሌላ(ይገለፅ)----- |
| 401.8 | ባለፉት 9 ወራትውስጥባለቤትዎከላይየተጠቀሱትንየአካላዊጥቃቶችበየስንትጊዜውይፈፅሙበዎትነበር? | 1. በየቀኑ  2. ቢያንስበሳምንትውስጥአንዴ  3. ቢያንስበወርውስጥአንዴ  4. ቢያንስበዚህ 9 ወርአንዴ  5. ምንምአልተፈፀመብኝም |
| 401.9 | ከላይከተጠቀሱትየጥቃትዓይነቶችውስጥበሌላሰውማለትምበጓደኛ. በዘመድ፣በእንግዳናበሌሎችበእርስዎላይባለፉት 9 ወራትየተፈፀሙአሉ? | 1. አዎ 2. የለም |
| 401.10 | ለጥያቄ 4019 መልስዎአዎከሆነ, ማነውጥቃትየፈጸመብዎት? | 1. ሴትአማቴ  2. ወንድአማቴ  3. በእንግዳሰው  4. ሌላ (ይገለጽ) ________ |

**በነብሰጡርእናቶችላይየሚፈፀሙስነ_ልቦናዊጥቃቶችንየተመለከቱጥያቄዎች**

| ተ/ቁ | | ጥያቄዎች | | መልስ |
| --- | --- | --- | --- | --- |
| 402.1 | | ባለቤትዎባለፉት 9 ወራትውስጥበመጥፎቃላትስለሰደበዎት | | 1. አዎ 2. የለም |
|  | | ራስዎንእስኪጠሉመጥፎስሜትተሰምትዎትያውቃል ? | |  |
| 402.2 | | ባለቤትዎባለፉት 9 ወራትውስጥእንደዱላ፣ቀበቶ፣ቢላዋ፣ጠብመንጃወይምሌላየጦርመሳሪያበመጠቀምአስፈራርተዎትያውቃሉ | | 1. አዎ 2. የለም |
| 402.3 | | ባለቤትዎችላእንዳለዎትተሰምቶዎትያውቃል? | | 1. አዎ 2. የለም |
| 402.4 | | ባለፉት 9 ወራትውስጥባለቤትዎበሰውፊትአሸማቀዎትወይምአሳፋሪቃላትተናግሮዎትያውቃል | | 1. አዎ 2. የለም |
| 402.5 | | ባለፉት 9 ወራትውስጥባለቤትዎሆንብሎመሰረታዊፍላጎትዎንእንዳይፈጽሙከልክሎትያውቃል? | | 1. አዎ 2. የለም |
| 402.6 | | ባለፉት 9 ወራትውስጥባለቤትዎሆንብሎበቤሰብዎጉዳይውሳኔእንዳይሰጡከልክለዎትያውቃል? | | 1. አዎ 2. የለም |
| 402.7 | | ባለቤትዎባለፉት 9 ወራትውስጥሆንብሎአሳዝኖዎትወይምአበሳጭቶዎትያውቃል ? | | 1. አዎ 2. የለም |
| 402.8 | | ባለቤትዎሆንብለውቤተሰብዎን፣ዘመድዎንወይመሌላየሚዎዱትንነገርለመጉዳትዝተውብዎትያውቃሉ? | | 1. አዎ 2. የለም |
| 402.9 | | ባለቤትዎከላይየተጠቀሱትንየሥነ_ልቦናዊጥቃቶችበየስንትጊዜውይፈፀሙበዎትነበር? | | 1. በየቀኑ  2. ቢያንስበሳምንትውስጥአንዴ  3. ቢያንስበወርውስጥአንዴ  4. ቢያንስ በዚህ 9 ወር አንዴ 5. ምንም አልተፈፀመብኝም |
| 402.10 |  | | ከዚህበላይከተዘረዘሩትየጥቃትዓይነቶችውስጥባለፉት 9 ወራትበሌላሰውማለትምበጓደኛ፣በዘመድ፣በእንግዳወይምበሌላሰውእርስዎደርሶብዎትያውቃል? | 1. አዎ 2. የለም |
| 402.11 | ለጥያቄ 4019 መልስዎአዎከሆነ, ማነውጥቃትየፈጸመብዎት? | | | 1. ሴትአማቴ  2. ወንድአማቴ  3. ሌላእንግዳሰው 4. ሌላ (ይገለጽ) ________ |

**በነብሰጡርእናቶችላይየሚፈፀሙ ፆታዊ ጥቃቶች ( ከግበረስጋግንኙነትጥቃት) ጋርየተያያዙጥያቄዎች**

| ተ/ቁ | ጥያቄዎች | መልስ |
| --- | --- | --- |
| 403.1 | ባለቤትዎበግብረስጋግንኙነትየሚተላለፍበሽታእንዳለበትቢያውቁናሳይታከምግንኙነትማድረግቢፈልግይፈቅዱታል? | 1. አዎ 2. የለም |
| 403.2 | ባለቤትዎእርስዎሳይፈልጉግብረስጋግንኙነትእንዲያደርጉአስገድደዎትያውቃሉ? | 1. አዎ 2. የለም |
| 403.3 | ባለቤትዎሆንብለውየእርስዎንየግብረስጋግንኙነትፍላጎትከልክለዎትያውቃሉ? | 1. አዎ 2. የለም |
| 403.4 | ፍላጎትሳይኖርዎትባለቤትዎየሆነነገርያደርገኛልብለውበመፍራትግብረስጋግንኙነትአድርገውያውቃሉ? | 1. አዎ 2. የለም |
| 403.5 | በባለቤትዎያልተለመደ (አሳፋሪ) ነውብለውየሚስቡትንዓይነትየግብረስጋግንኙነትእንዲያደርጉአስገድዶዎትያውቃሉ? (በአፍ; በፊንጢጣወዘተ) | 1. አዎ 2. የለም |
| 403.6 | ከላይየተጠቀሱትፆታዊጥቃቶችበየስንትጊዜውይፈፀሙበዎትነበር? | 1. በየቀኑ  2. ቢያንስበሳምንትውስጥአንዴ  3. ቢያንስበወርውስጥአንዴ  4. ቢያንስበዚህ 9 ወርአንዴ  5. ምንምአልተፈፀመብኝም |
| 403.7 | ከዚህበላይከተጠቀሱትጥቃቶችበሌላሰውማለትምበጓደኛ፣በዘመድ፣በእንግዳናበሌሎችተፈፅሞብዎትያውቃል? | 1. አዎ 2. የለም |
| 403.8 | ለጥያቄ 403.7 መልስዎአዎከሆነ, ማነውጥቃትየፈጸመብዎት? | 1. በባለበቴወንድም  2. በወንድአማቴ  3. በእንግዳሰው  4. ሌላ (ይገለጽ) ________ |
